# Supplementary material for: Macroporous monolithic Magnéli-phase titanium suboxides as anode material for effective bioelectricity generation in microbial fuel cells
Source: Royal Society of Chemistry journal article supplement (doi:10.1039/c6ta07521e), 2016-01-01
Supplement: c6ta07521e1.pdf [file c6ta07521e1.pdf]

Electronic Supplementary Information (ESI):

## **Macroporous monolithic Magnéli-phase titanium suboxides anode for effective bioelectricity generation in microbial fuel cells**

Ming Ma,<sup>a</sup> Shijie You,<sup>\*a</sup> Guoshuai Liu,<sup>a</sup> Jiuhui Qu<sup>b</sup> and Nanqi Ren<sup>a</sup>

<sup>a</sup> *State Key Laboratory of Urban Water Resource and Environment, Harbin Institute of Technology, 73 Huanghe Road, Nangang District, Harbin, 150090, P. R. China .*

<sup>b</sup> *State Key Laboratory of Environmental Aquatic Chemistry, Research Centre for Eco-Environmental Sciences, Chinese Academy of Sciences, Beijing, 200085, P. R. China .*

*Corresponding author:*

*Shijie You*

*E-mail: sjyou@hit.edu.cn*

### ***Preparation of macroporous monolithic titanium suboxides (MM-TiSO) electrode***

The MM-TiSO was prepared by high-temperature H<sub>2</sub> reduction of TiO<sub>2</sub>. In brief, the rutile TiO<sub>2</sub> powders were mixed by water and isopropanol (1:1, v/v) to decrease the capillary force of powder, followed by reduction at H<sub>2</sub> atmosphere at 1050 °C for 4 h. The as-prepared Ti<sub>4</sub>O<sub>7</sub> powders were cleaned, dried, and added 5% (w/w) polyethylene oxide solution binder and carbon as porosity-producing agent, and then the mixture was compressed in a uniaxial press at 20 MPa to form a plate shape with diameter size of 3 cm. The plate blocks were sintered in air to remove the impurities.

### ***Characterizations***

The X-ray diffraction (XRD) analysis was conducted with an X-ray diffractometer (Bruke D8 Adv., Germany) using Cu K  $\alpha$  radiation ( $\lambda = 0.15406$  nm) at a power of 40 keV $\times$ 30 mA. The chemical compositions of the materials were identified by using an X-ray photoelectron spectrometer (XPS;

PH1-5700 ESCA system, U.S.) equipped with a hemispherical analyzer and an aluminum anode (monochromatic Al K $\alpha$  1486.6 eV) as source (at 12–14 KV and 10–20 mA). The morphology of the electrode and biofilm was observed by using field–emission scanning electron microscopy (SEM, Helios Nanolab600i, FEI, U.S.).

The electrochemical behaviors of MM-TiSO monolith were investigated using three–electrode cell based on PARSTAT (CHI700D, Chenhua Co. Ltd., China) electrochemical system at room temperature (25 °C). The bioelectrochemical properties were examined using a small glass cylinder (5.0 mL) mounted with a silicone elastomer cap as the electrochemical cell, and all the experiments were done at scan rate of 1mV s<sup>-1</sup> unless stated otherwise. The transfer coefficient ( $\alpha$ ) and heterogeneous electron transfer rate constant ( $k_s$ ) were estimated by Loviron's theory.<sup>50</sup> Current density and power density normalized to the cathode surface area (A cm<sup>2</sup> and W m<sup>-2</sup>) were calculated from  $j=I/A$  and  $P=IU/A$ . Electrochemical impedance spectroscopy (EIS) was conducted over the frequency range of 100000 Hz to 0.01 Hz with a sinusoidal perturbation of 10 mV. Tafel plots were recorded for each anode by sweeping voltage from  $\eta = 0\pm 80$  mV at 1 mV s<sup>-1</sup>, where  $\eta = 0$  is the open circuit potential (OCP) of the anode versus the reference electrode (SCE).

### ***MFC construction and operation***

The anode of MFC reactors was inoculated with mixed cultured well-running reactor in the Lab., and the media contained acetate (0.82 g L<sup>-1</sup>), NH<sub>4</sub>Cl (0.31 g L<sup>-1</sup>), NaH<sub>2</sub>PO<sub>4</sub>·2H<sub>2</sub>O (3.321 g L<sup>-1</sup>), Na<sub>2</sub>HPO<sub>4</sub>·12H<sub>2</sub>O (10.3174 g L<sup>-1</sup>), KCl (0.13 g L<sup>-1</sup>), trace minerals (12.5 mL L<sup>-1</sup>), and vitamins (5 mL L<sup>-1</sup>). Reactors were operated in fed-batch mode at 30 $\pm$ 1 °C, and substrates were replaced when voltage is lower than 50 mV. The cell voltage data was collected by using an on–line data acquisition system (Model 2700, Keithley Instruments, Inc., Cleveland, OH, U.S.), and then converted to power density. Cubic-shaped single-chamber MFC reactor (28 mL, 4 cm long cylindrical chamber) was made up with different anodes placed on the opposite side of Plexiglas tube at a fixed external circuit resistance of 1000  $\Omega$ . All tests were conducted at least three duplicates, with average values ( $\pm$ S.D.) of duplicates given in the text. Only one of these duplicates was shown in the figures for clarity.

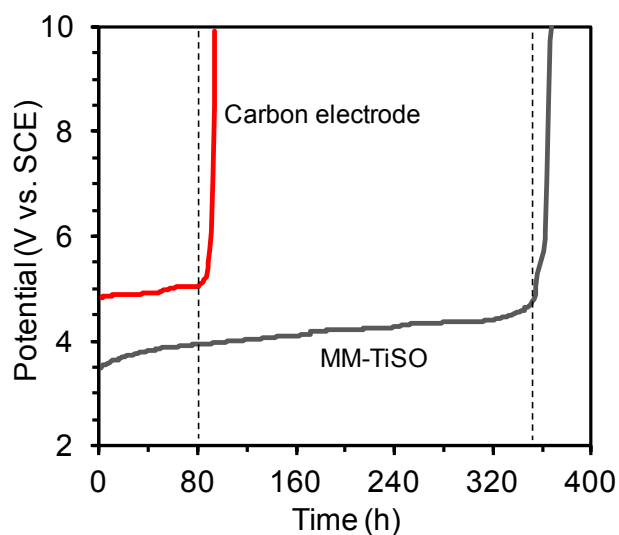

**Fig. S1** Time course of potential during accelerated life tests in 3.0 mol L<sup>-1</sup> H<sub>2</sub>SO<sub>4</sub> at current density of 1.0 A cm<sup>-2</sup> and temperature of 30 °C.<sup>52</sup>

**Table S1** Comparison of MFC performances for different anode materials.

| Anode                      | Morphology  | Electrolyte<br>(PBS, mM) | OCV<br>(V) | Power density<br>(mW m <sup>-2</sup> ) | Ref. |
|----------------------------|-------------|--------------------------|------------|----------------------------------------|------|
| Graphene                   | Monolithic  | 50                       | 0.623      | 897.1                                  | [39] |
| CNT hydrogel               | Porous      | 50                       | 0.566      | 132                                    | [40] |
| Polypyrrole                | Nanotube    | 50                       | 0.593      | 612                                    | [41] |
| MnO <sub>2</sub> framework | Macroporous | 50                       | 0.695      | 596.5                                  | [42] |
| CP/GNRs/PANI               | Nanowire    | 100                      | 0.785      | 856                                    | [43] |
